# Supplementary material for: Rapamycin Affects the Hippocampal SNARE Complex to Alleviate Cognitive Dysfunction Induced by Surgery in Aged Rats
Source: MDPI journal article supplement (doi:10.3390/brainsci13040598), 2023-03-31
Supplement: s1 [file s1]

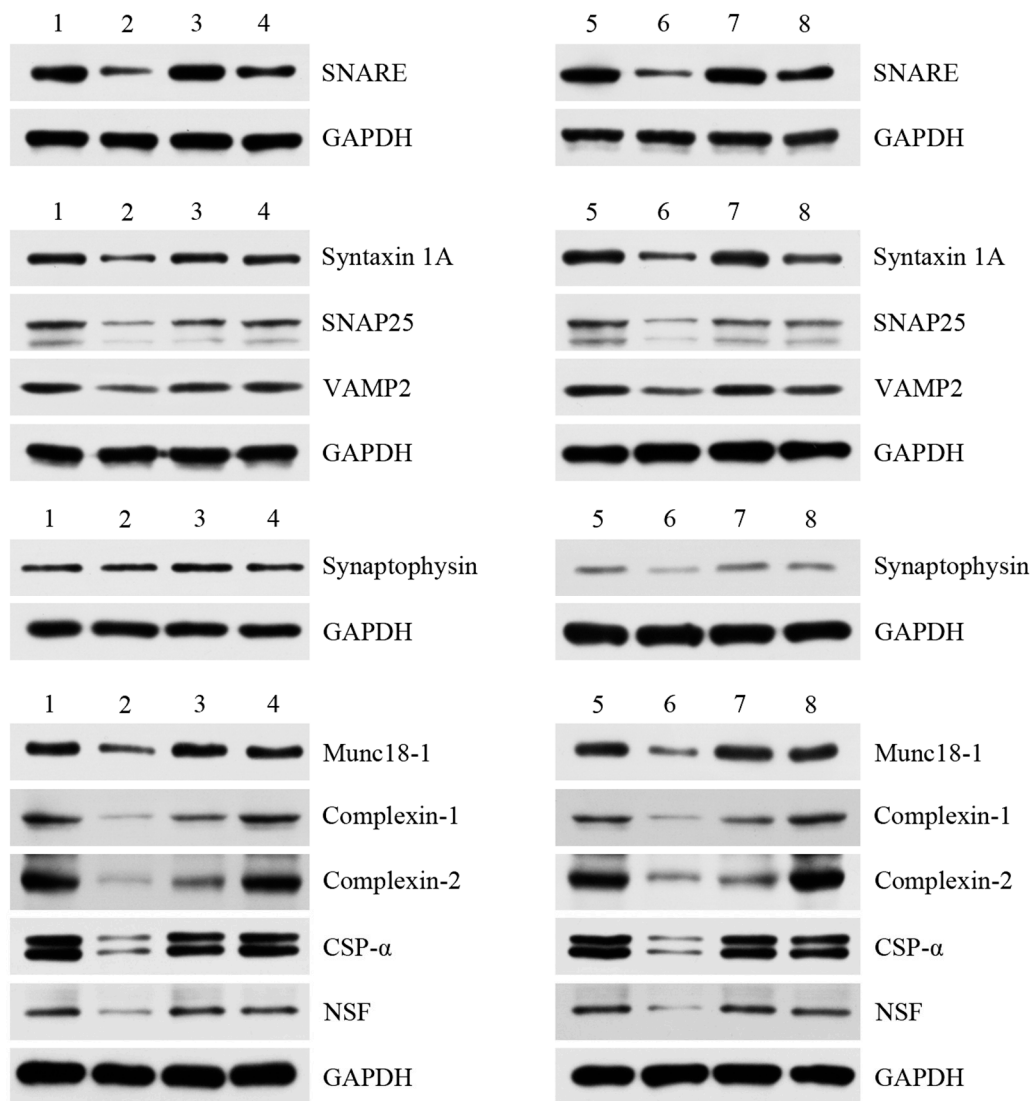

Figure S1 shows the original image of a western blot that was performed to detect the expression of a protein of interest in different samples. The image was captured using an imaging device and has not been edited or cropped.
